# Supplementary material
Source: PubMed Central journal article supplement (PMC5436614)
Supplement: NIHMS857861-supplement-1.pdf [file NIHMS857861-supplement-1.pdf]

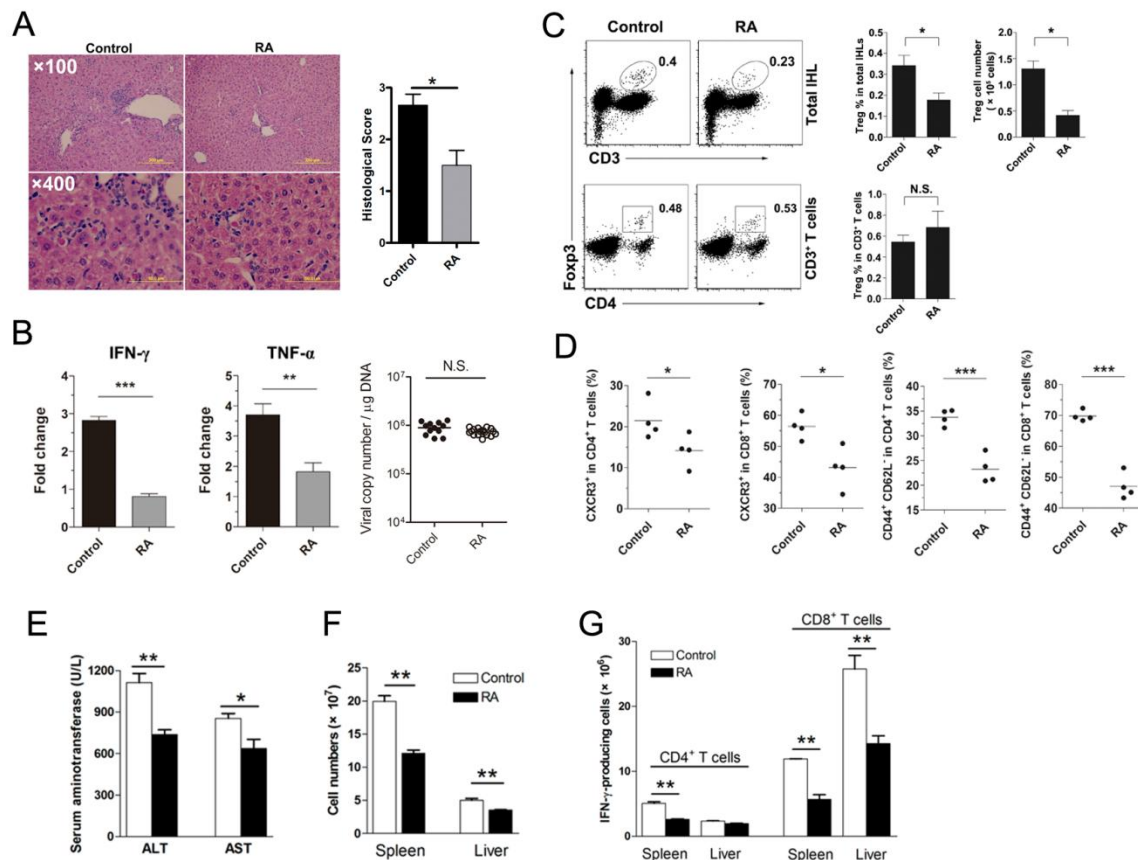

**Figure S1. Retinoic acid alleviated liver injury in viral hepatitis.**

C57BL/6 mice were injected *i.v.* with  $3 \times 10^9$  pfu of AdLacZ. Mice were injected *i.p.* with 250  $\mu$ g retinoic acid (RA) or DMSO (control) daily and sacrificed at day 6 post-infection. **(A)** Liver tissues were obtained from Ad-infected control and RA-treated mice, and the tissue sections were stained with H&E. Histological scores were analyzed by three researchers independently. Representative image is shown. **(B)** Intrahepatic lymphocytes were isolated and mRNA levels of cytokines were measured by qPCR. Viral copy numbers in the liver were also analyzed by qPCR. **(C)** Flow cytometric analysis of Foxp3 of intrahepatic IHLs (*upper panel*) and CD3<sup>+</sup> T cells (*lower panel*). *Right panel*: Cumulative statistical results of the percentages and absolute cell numbers of Foxp3<sup>+</sup> cells in the intrahepatic IHLs or CD3<sup>+</sup> T cells, respectively. **(D)** Splenocytes were stained for surface markers (CD3, CD4, CD8, CXCR3, CD44 and CD62L) and examined by flow cytometry. **(E-G)** Infected mice were injected *i.p.* with DMSO (control) or 25  $\mu$ g RA (moderate dose) daily and sacrificed at 6 days post infection (dpi). **(E)** Serum ALT and AST levels. **(F)** Total numbers of IHLs and splenocytes. **(G)** Absolute numbers of cytokine-producing T cells in the spleen and livers. \* $p < 0.05$ ; \*\* $p < 0.01$ .

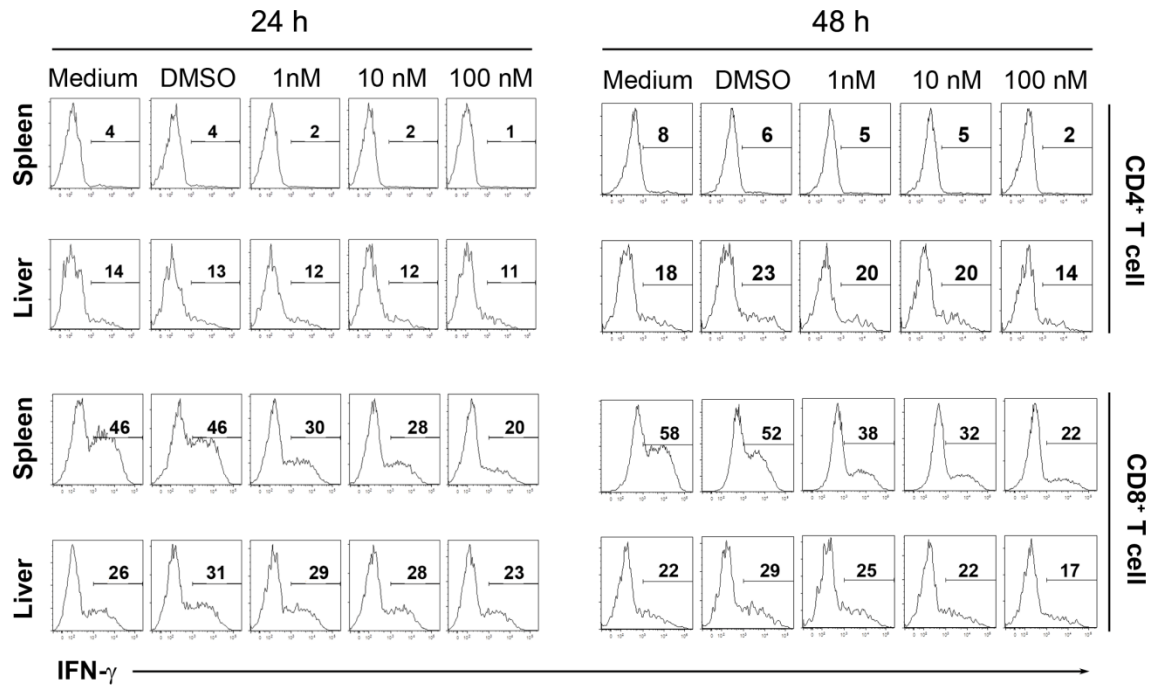

**Figure S2. Retinoic acid inhibited IFN- $\gamma$  production in CD4<sup>+</sup> and CD8<sup>+</sup> T cells in vitro.**

C57BL/6 mice were injected *i.v.* with  $3 \times 10^9$  pfu of AdLacZ. Splenocytes and IHL were isolated and cultured with RA of indicated concentrations (1, 10 and 100 nM) in the anti-CD3 coated plate. DMSO was used as a solvent control and medium only was used as a blank control. Cells were collected at 24 h and 48 h, and GolgiStop was added at the last 4 h of culture. CD4<sup>+</sup> and CD8<sup>+</sup> T cells were gated first, follow by analysis of intracellular IFN- $\gamma$  levels by flow cytometry. Representative images are shown.

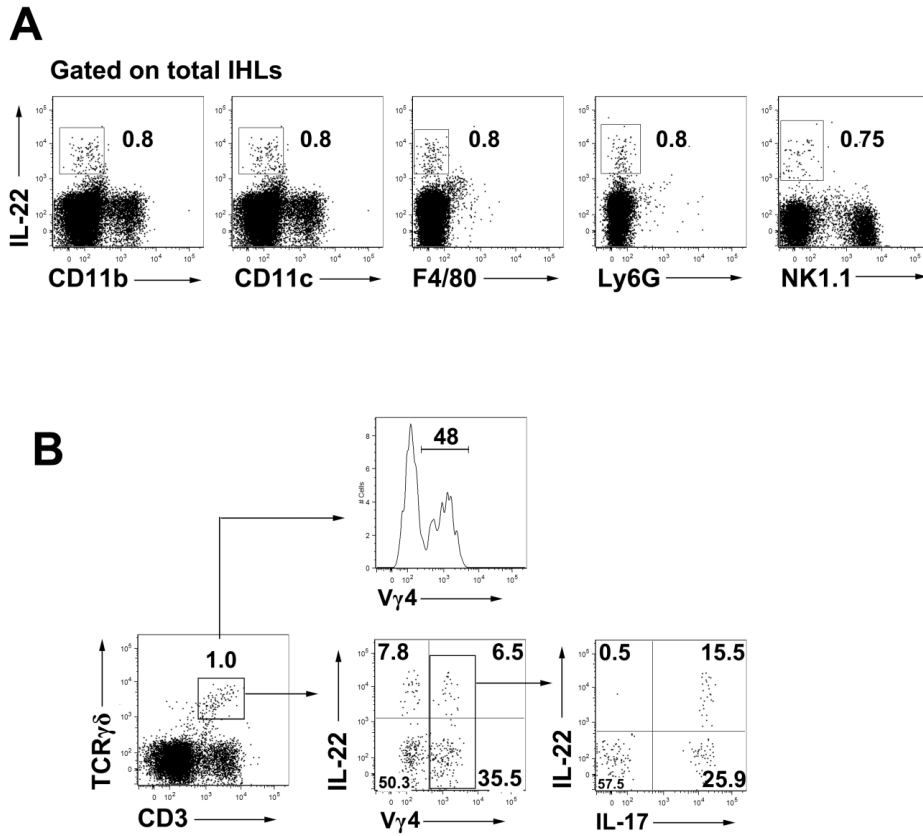

**Figure S3.  $V\gamma 4$  T cells is an important cellular source of IL-22.**

IHLs from day 1 infected mice were *in vitro* stimulated for 16 h with recombinant IL-23 (20ng/ml) plus GolgiStop in the last 4 h. Intracellular IL-22 expression was analyzed by flow cytometry. **(A)** IL-22 level was analyzed in  $CD11b^+$ ,  $CD11c^+$ ,  $F4/80^+$ ,  $Ly6G^+$ , and  $NK1.1^+$  cells. **(B)** The IHLs were gated on  $\gamma\delta$  T cells and  $V\gamma 4$  T cells were further gated.  $V\gamma 4$  T cells were analyzed for IL-17 and IL-22 production by flow cytometry. Representative *dot plots* are shown.

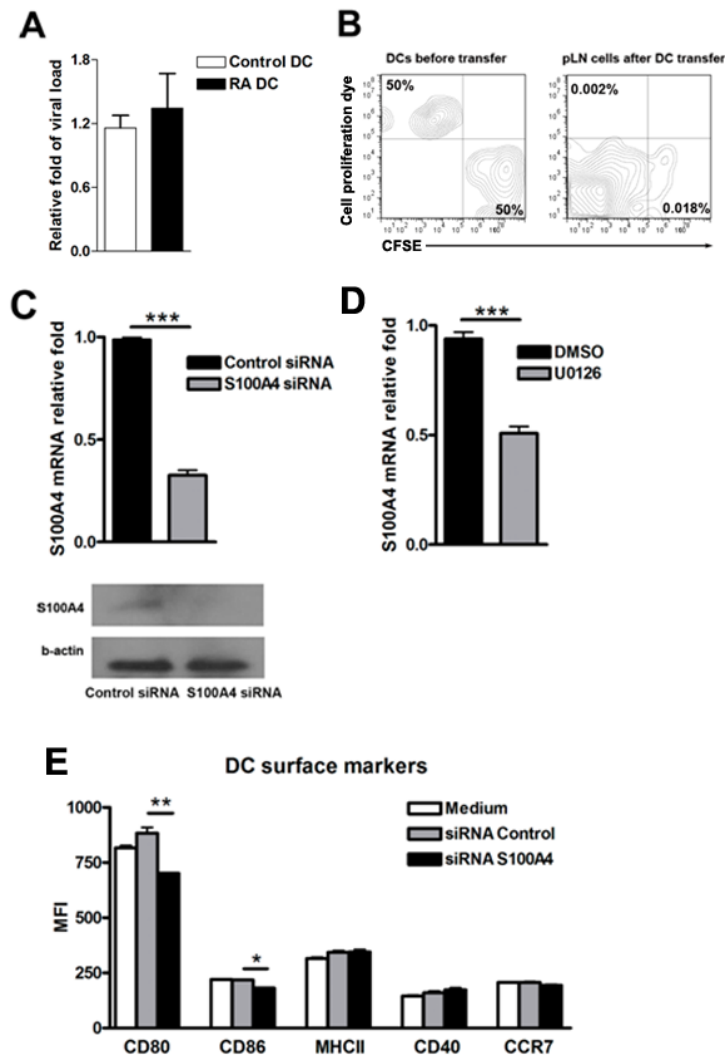

**Figure S4. RA-treated DCs have impaired migration ability in vivo and S100A4 siRNA transfection silenced the S100A4 gene and protein expression in DCs.**

(A) Control DCs and RA-treated DCs were infected with AdLacZ (MOI: 300) *in vitro* for 24 hours, and the relative fold of viral load was determined by qPCR analysis. (B) DCs were infected with AdLacZ (MOI: 300) *in vitro*. Control DCs and RA-treated DCs were labeled with CFSE and cell proliferation dye eflour 670 respectively, and mixed by 1:1 ratio. DCs were injected *s.c.* into the hind foot. Popliteal draining lymph nodes (LNs) were harvested 1 day later and analyzed for DC migration *in vivo*. (C) BMDCs were transfected with S100A4 siRNA or control siRNA for 6 h. Cells S100A4 gene and protein levels were detected at 24 h and 72 h by qPCR and Western blot. (D) ERK inhibitor U0126 (10  $\mu$ M) was added into the DC culture system. DMSO was used as a control. Cells were collected at 24 h of cultured for analysis of S100A4 gene levels by qPCR. (E) DCs were transfected with S100A4 siRNA or control siRNA for 6 h. DC surface markers were detected at 72 h.
